# Supplementary material for: Catheter Diversion Procedure With Exit-Site Renewal Promotes Peritoneal Dialysis Catheter Survival
Source: PubMed Central journal article supplement — Kidney Int Rep. 2020 Dec 7;6(2):325–32. doi: 10.1016/j.ekir.2020.11.030 (PMC7879110; doi:10.1016/j.ekir.2020.11.030), 2020-12-07
Supplement: mmc1.pdf [file mmc1.pdf]

Supplementary file

Supplementary Table 1

|                             |   | follow-up |      | lost to follow-up |         | Total |      |
|-----------------------------|---|-----------|------|-------------------|---------|-------|------|
| CDP                         |   | +         | -    | +                 | -       | +     | -    |
| PD discontinuation or death | + | 8         | 47   | (1)*              | (4)*    | 9     | 51   |
|                             | - | 22        | 60   | (2)*              | (4)*    | 24    | 64   |
| number of patients          |   | 30        | 107  | 3                 | 8       | 33    | 115  |
| occurrence rate             |   | 0.27      | 0.44 | (0.27)*           | (0.44)* | 0.27  | 0.44 |
| odds ratio                  |   | 0.46      |      |                   |         | 0.47  |      |

\*: estimated or calculated based on the result of follow-up subgroup

|                             |   | follow-up |      | lost to follow-up |          | Total |      |
|-----------------------------|---|-----------|------|-------------------|----------|-------|------|
| CDP                         |   | +         | -    | +                 | -        | +     | -    |
| PD discontinuation or death | + | 8         | 47   | (1)**             | (3)**    | 9     | 50   |
|                             | - | 22        | 60   | (2)**             | (5)**    | 24    | 65   |
| number of patients          |   | 30        | 107  | 3                 | 8        | 33    | 115  |
| occurrence rate             |   | 0.27      | 0.44 | (0.40)**          | (0.40)** | 0.27  | 0.44 |
| odds ratio                  |   | 0.46      |      |                   |          | 0.49  |      |

\*\* : estimated or calculated based on an earlier study

To evaluate the effect of bias because of lost to follow-up, we created a two-by-two contingency table of two groups depending on traceability at 4 years from PD initiation. Three of 33 patients in the CDP group and eight of 115 patients in the non-CDP group were classified into a lost to follow-up subgroup. The odds ratio (OR) calculated for the follow-up subgroup was 0.46. If the occurrence rate of outcome in the lost to follow-up subgroup was estimated based on that observed in the follow-up subgroup (0.27 for CDP, 0.44 for non-CDP group) and the NEXT-PD study (0.4 in both

groups)<sup>3</sup>, then ORs calculated from the “Total” two by two table were 0.47 and 0.49, respectively.

Because each value of calculated OR was similar, the impact of lost to follow-up patients against the relation between CDP and PD catheter survival might be weak.
